# Supplementary material
Source: PubMed Central journal article supplement (PMC10023495)
Supplement: NIHMS1870094-supplement-Supp1.pdf [file NIHMS1870094-supplement-Supp1.pdf]

**Health outcomes among offspring of United States Coast Guard responders to the Deepwater Horizon oil spill, 2010-2011**  
**Supplemental File: Infant Outcome Assessment**

- **Low birthweight (<2500 grams)** was determined from ICD-9 codes 764.xx (slow fetal growth and fetal malnutrition), 765.0x (extreme immaturity), and 765.1x (other preterm infants); the fifth digit indicates a birth weight category. The first code recorded within 28 days of an infant’s birth was used to establish the weight category. If more than one code was assigned on the same day, the lowest recorded weight was used. Infants with no weight codes were assumed to be of normal birth weight.
- **Preterm birth (< 37 completed weeks’ gestation)** was determined from ICD-9 codes 765.2x (weeks of gestation), 765.1x (other preterm infants), and 644.2x (early onset of delivery). Infants with no gestational age codes were assumed to be full term.
- **Major structural birth defect(s)** were defined by selected ICD-9 codes (see Table); categories of birth defects required relevant diagnoses in the first year of life, either on 1 inpatient record or 2 outpatient records on different days.

**Table.** List of ICD-9 Codes for Major Structural Birth Defects, Department of Defense Birth and Infant Health Research Program Data

| Birth Defect Category                                                                        | ICD-9 Code | ICD-9 Code Description                                                                                 |
|----------------------------------------------------------------------------------------------|------------|--------------------------------------------------------------------------------------------------------|
| Spina bifida                                                                                 | 741.0x     | Spina bifida with hydrocephalus                                                                        |
|                                                                                              | 741.9x     | Spina bifida without hydrocephalus                                                                     |
| Encephalocele                                                                                | 742.0      | Encephalocele                                                                                          |
| Microcephalus                                                                                | 742.1      | Microcephalus                                                                                          |
| Holoprosencephaly                                                                            | 742.2      | Reduction deformities of brain                                                                         |
| Anophthalmia, microphthalmia                                                                 | 743.00     | Clinical anophthalmos, unspecified                                                                     |
|                                                                                              | 743.06     | Cryptophthalmos                                                                                        |
|                                                                                              | 743.1      | Microphthalmos, unspecified                                                                            |
|                                                                                              | 743.11     | Simple microphthalmos                                                                                  |
|                                                                                              | 743.12     | Microphthalmos associated with other anomalies of eye and adnexa                                       |
| Cataracts and other lens defects                                                             | 743.30     | Congenital cataract, unspecified                                                                       |
|                                                                                              | 743.31     | Capsular and subcapsular cataract                                                                      |
|                                                                                              | 743.32     | Cortical and zonular cataract                                                                          |
|                                                                                              | 743.33     | Nuclear cataract                                                                                       |
|                                                                                              | 743.34     | Total and subtotal cataract, congenital                                                                |
|                                                                                              | 743.35     | Congenital aphakia                                                                                     |
|                                                                                              | 743.36     | Anomalies of lens shape                                                                                |
|                                                                                              | 743.2x     | Buphthalmos                                                                                            |
| Anotia, microtia                                                                             | 744.01     | Absence of external ear                                                                                |
|                                                                                              | 744.23     | Microtia                                                                                               |
| Other cardiac defects: septal defects, heterotaxy, partial anomalous pulmonary venous return | 745.4      | Ventricular septal defect                                                                              |
|                                                                                              | 745.8      | Bulbus cordis anomalies and anomalies of cardiac septal closure (other)                                |
|                                                                                              | 745.9      | Bulbus cordis anomalies and anomalies of cardiac septal closure (unspecified defect of septal closure) |
|                                                                                              | 747.42     | Partial anomalous pulmonary venous return                                                              |
|                                                                                              | 759.3      | Situs inversus (Laterality defects—heterotaxy)                                                         |

| Birth Defect Category                                                                                                                                                                                                                                                                                                                           | ICD-9 Code                                  | ICD-9 Code Description                                          |
|-------------------------------------------------------------------------------------------------------------------------------------------------------------------------------------------------------------------------------------------------------------------------------------------------------------------------------------------------|---------------------------------------------|-----------------------------------------------------------------|
| Severe cardiac defects: single ventricle, tricuspid atresia, Ebstein's anomaly, hypoplastic left heart, hypoplastic right heart, common truncus, transposition of great vessels, atrioventricular septal defects, tetralogy of fallot, aortic atresia/stenosis, coarctation, total anomalous pulmonary venous return, anomalous coronary artery | 745.0                                       | Common truncus                                                  |
|                                                                                                                                                                                                                                                                                                                                                 | 745.1x                                      | Transposition of great vessels                                  |
|                                                                                                                                                                                                                                                                                                                                                 | 745.2                                       | Tetralogy of Fallot                                             |
|                                                                                                                                                                                                                                                                                                                                                 | 745.3                                       | Single ventricle (common ventricle)                             |
|                                                                                                                                                                                                                                                                                                                                                 | 745.6x                                      | Atrioventricular septal defects                                 |
|                                                                                                                                                                                                                                                                                                                                                 | 745.7                                       | Cor biloculare                                                  |
|                                                                                                                                                                                                                                                                                                                                                 | 746.00                                      | Pulmonary valve anomaly, unspecified                            |
|                                                                                                                                                                                                                                                                                                                                                 | 746.01                                      | Pulmonary valve atresia, congenital                             |
|                                                                                                                                                                                                                                                                                                                                                 | 746.1                                       | Tricuspid atresia and stenosis                                  |
|                                                                                                                                                                                                                                                                                                                                                 | 746.2                                       | Ebstein's anomaly                                               |
|                                                                                                                                                                                                                                                                                                                                                 | 746.3                                       | Aortic valve atresia/stenosis                                   |
|                                                                                                                                                                                                                                                                                                                                                 | 746.7                                       | Hypoplastic left heart syndrome                                 |
|                                                                                                                                                                                                                                                                                                                                                 | 746.85                                      | Coronary artery anomaly                                         |
|                                                                                                                                                                                                                                                                                                                                                 | 747.1x                                      | Coarctation of aorta                                            |
|                                                                                                                                                                                                                                                                                                                                                 | 747.22                                      | Atresia and stenosis of aorta                                   |
| 747.41                                                                                                                                                                                                                                                                                                                                          | Total anomalous pulmonary venous connection |                                                                 |
| Choanal atresia/stenosis                                                                                                                                                                                                                                                                                                                        | 748.0                                       | Choanal atresia                                                 |
| Cleft lip and/or palate                                                                                                                                                                                                                                                                                                                         | 749.0x                                      | Cleft palate                                                    |
|                                                                                                                                                                                                                                                                                                                                                 | 749.1x                                      | Cleft lip                                                       |
|                                                                                                                                                                                                                                                                                                                                                 | 749.2x                                      | Cleft palate with cleft lip                                     |
| Biliary atresia                                                                                                                                                                                                                                                                                                                                 | 751.61                                      | Biliary atresia                                                 |
| Esophageal atresia ± tracheoesophageal fistula                                                                                                                                                                                                                                                                                                  | 750.3                                       | Tracheoesophageal fistula, esophageal atresia and stenosis      |
| Intestinal atresia/stenosis                                                                                                                                                                                                                                                                                                                     | 751.1                                       | Atresia and stenosis of small intestine                         |
|                                                                                                                                                                                                                                                                                                                                                 | 751.2                                       | Atresia and stenosis of large intestine, rectum, and anal canal |
| Pyloric stenosis                                                                                                                                                                                                                                                                                                                                | 750.5                                       | Congenital hypertrophic pyloric stenosis                        |
| Exstrophy, bladder                                                                                                                                                                                                                                                                                                                              | 753.5                                       | Exstrophy of urinary bladder                                    |
| Hypospadias—second or third degree                                                                                                                                                                                                                                                                                                              | 752.61                                      | Hypospadias                                                     |
| Renal agenesis/hypoplasia                                                                                                                                                                                                                                                                                                                       | 753.0                                       | Renal agenesis and dysgenesis                                   |
| Renal dysplasia                                                                                                                                                                                                                                                                                                                                 | 753.15                                      | Renal dysplasia                                                 |
| Congenital hydronephrosis                                                                                                                                                                                                                                                                                                                       | 753.2x                                      | Obstructive defects of renal pelvis and ureter                  |
|                                                                                                                                                                                                                                                                                                                                                 | 753.6                                       | Atresia and stenosis of urethra and bladder neck                |
| Posterior urethral valve and/or prune belly                                                                                                                                                                                                                                                                                                     | 756.71                                      | Prune belly syndrome                                            |
|                                                                                                                                                                                                                                                                                                                                                 | 756.72                                      | Omphalocele                                                     |
| Gastroschisis or omphalocele                                                                                                                                                                                                                                                                                                                    | 756.73                                      | Gastroschisis                                                   |
|                                                                                                                                                                                                                                                                                                                                                 | 756.79                                      | Other congenital anomalies of abdominal wall                    |
| Diaphragmatic hernia                                                                                                                                                                                                                                                                                                                            | 756.6                                       | Anomalies of diaphragm                                          |
| Limb reduction defects                                                                                                                                                                                                                                                                                                                          | 755.2x                                      | Reduction deformities of upper limb                             |
|                                                                                                                                                                                                                                                                                                                                                 | 755.3x                                      | Reduction deformities of lower limb                             |
|                                                                                                                                                                                                                                                                                                                                                 | 755.4                                       | Reduction deformities, unspecified limb                         |
|                                                                                                                                                                                                                                                                                                                                                 | 755.58                                      | Congenital cleft hand                                           |
